# Supplementary material
Source: PubMed Central journal article supplement (PMC11610247)
Supplement: NIHMS2026843-supplement-2.pdf [file NIHMS2026843-supplement-2.pdf]

119 **Supplementary Table 1. *GLPIR* variants that were functionally analyzed *in vitro*.**

| <b>GLPIR variants (NM_002062.5)</b> | <b>MAF ExAC</b> | <b>Included in UKB</b> |
|-------------------------------------|-----------------|------------------------|
| c.128G>A/p.Arg43Gln                 | 0.000017        | x                      |
| c.131G>A/p.Arg44His                 | 0.0037          | x                      |
| c.251G>C/p.Ser84Thr                 |                 |                        |
| c.287C>T/p.Pro96Leu                 |                 | x                      |
| c.410C>T/p.Pro137Leu                | 0.000051        | x                      |
| c.513C>A/p.His171Gln                | 0.0000084       |                        |
| c.518A>G/p.His173Arg                | 0.000042        | x                      |
| c.518A>C/p.His173Pro                | 0.0000083       |                        |
| c.524C>T/p.Thr175Ile                | 0.0000083       |                        |
| c.526A>T/p.Arg176Trp                | 0.000017        | x                      |
| c.538C>T/p.His180Tyr                | 0.0000082       |                        |
| c.569G>A/p.Arg190Gln                | 0.0000082       | x                      |
| c.580G>A/p.Val194Ile                | 0.00048         | x                      |
| c.622G>A/p.Ala208Thr                |                 |                        |
| c.679C>T/p.Arg227Cys                | 0.0000082       | x                      |
| c.680G>A/p.Arg227His                | 0.0000082       | x                      |
| c.692T>C/p.Leu231Pro                | 0.0000082       |                        |
| c.707G>A/p.Cys236Tyr                |                 |                        |
| c.715G>A/p.Ala239Thr                | 0.00016         | x                      |
| c.730C>T/p.Leu244Phe                | 0.0000082       |                        |
| c.745G>A/p.Val249Met                | 0.000091        | x                      |
| c.773C>T/p.Ser258Leu                | 0.0000082       | x                      |
| c.781T>G/p.Ser261Ala                | 0.0000082       |                        |
| c.790T>C/p.Trp264Arg                | 0.0000082       |                        |
| c.802C>T/p.Leu268Phe                | 0.00024         | x                      |
| c.808G>A/p.Val270Met                | 0.000025        | x                      |
| c.860T>A/p.Val287Asp                | 0.0000082       |                        |
| c.868C>T/p.Leu290Phe                |                 |                        |
| c.872A>G/p.Tyr291Cys                | 0.0000082       | x                      |
| c.875A>T/p.Glu292Val                | 0.0000082       | x                      |
| c.877G>T/p.Asp293Tyr                | 0.000016        | x                      |
| c.880G>A/p.Glu294Lys                | 0.000091        | x                      |
| c.928C>T/p.Arg310Trp                | 0.0000082       | x                      |
| c.929G>A/p.Arg310Gln                | 0.0000082       | x                      |
| c.946G>A/p.Ala316Thr                | 0.010           | x                      |
| c.950T>C/p.Ile317Thr                | 0.000058        | x                      |
| c.958A>T/p.Asn320Tyr                | 0.0000082       |                        |
| c.976C>T/p.Arg326Trp                | 0.0000082       | x                      |
| c.991G>A/p.Val331Met                | 0.000016        | x                      |
| c.1014T>A/p.Asn338Lys               |                 |                        |
| c.1021T>A/p.Cys341Ser               | 0.0000082       | x                      |
| c.1032C>A/p.Asp344Glu               | 0.00027         | x                      |
| c.1064C>T/p.Thr355Ile               | 0.000017        |                        |
| c.1069A>T/p.Ile357Phe               | 0.0000083       |                        |
| c.1081G>A/p.Gly361Arg               | 0.0000083       |                        |
| c.1087C>T/p.His363Tyr               | 0.000017        |                        |
| c.1099T>C/p.Phe367Leu               | 0.0000082       |                        |
| c.1126C>T/p.Arg376Trp               | 0.000033        | x                      |
| c.1127G>A/p.Arg376Gln               | 0.0010          | x                      |
| c.1138C>T/p.Arg380Cys               | 0.0000082       | x                      |
| c.1199T>G/p.Ile400Arg               |                 |                        |
| c.1201T>A/p.Leu401Ile               | 0.0000083       |                        |
| c.1223A>G/p.Glu408Gly               | 0.000017        |                        |
| c.1250G>T/p.Trp417Leu               | 0.000016        | x                      |
| c.1249T>G/p.Trp417Gly               | 0.0000082       |                        |
| c.1256G>A/p.Arg419His               | 0.0000082       | x                      |
| c.1261C>T/p.Arg421Trp               | 0.00039         | x                      |
| c.1262G>A/p.Arg421Gln               | 0.0020          | x                      |
| c.1304C>T/p.Pro435Leu               | 0.0000082       |                        |
| c.1334G>C/p.Ser445Thr               | 0.0020          | x                      |

120 MAF, minor allele frequency; UKB, UK biobank

**Supplementary Table 2a. Cell surface expression of WT and mutant GLP1R in HEK293T cell (ELISA).**

| Variant | Surface exp (% WT) |
|---------|--------------------|---------|--------------------|---------|--------------------|---------|--------------------|
| R43Q    | 93 ± 3             | R227H   | 66 ± 8*            | D293Y   | 23 ± 4***          | H363Y   | 36 ± 14***         |
| R44H    | 97 ± 6             | L231P   | 3 ± 1***           | E294K   | 62 ± 7**           | F367L   | 63 ± 17            |
| S84T    | 91 ± 5             | C236Y   | 31 ± 6***          | R310Q   | 61 ± 17*           | R376Q   | 87 ± 4             |
| P96L    | 93 ± 6             | A239T   | 75 ± 10            | R310W   | 13 ± 2***          | R376W   | 74 ± 7             |
| P137L   | 89 ± 7             | L244F   | 50 ± 10***         | A316T   | 48 ± 8***          | R380C   | 105 ± 21           |
| H171Q   | 91 ± 11            | V249M   | 89 ± 13            | I317T   | 37 ± 11***         | I400R   | 2 ± 0***           |
| H173P   | 4 ± 2***           | S258L   | 29 ± 7***          | N320Y   | 4 ± 2***           | L401I   | 92 ± 9             |
| H173R   | 108 ± 12           | S261A   | 74 ± 8             | R326W   | 52 ± 11***         | E408G   | 18 ± 4***          |
| T175I   | 71 ± 16            | W264R   | 138 ± 11*          | V331M   | 55 ± 17*           | W417G   | 17 ± 2***          |
| R176W   | 8 ± 2***           | L268F   | 71 ± 12*           | N338K   | 93 ± 9             | W417L   | 74 ± 4             |
| H180Y   | 3 ± 1***           | V270M   | 95 ± 5             | C341S   | 94 ± 9             | R419H   | 75 ± 6             |
| R190Q   | 24 ± 2***          | V287D   | 5 ± 1***           | D344E   | 98 ± 13            | R421Q   | 60 ± 9**           |
| V194I   | 95 ± 6             | L290F   | 70 ± 8*            | T355I   | 100 ± 17           | R421W   | 70 ± 11            |
| A208T   | 104 ± 8            | Y291C   | 39 ± 8***          | I357F   | 20 ± 5***          | P435L   | 78 ± 12            |
| R227C   | 33 ± 3***          | E292V   | 11 ± 3***          | G361R   | 3 ± 2***           | S445T   | 99 ± 5             |

123

124

**Supplementary Table 2b. Cell surface expression of WT and mutant GLP1R in INS-1 823/3 (*Glp1r* KO) (ELISA).**

| Variant | Surface exp (% WT) |
|---------|--------------------|---------|--------------------|---------|--------------------|---------|--------------------|
| R43Q    | 58 ± 17            | R227H   | 53 ± 13*           | D293Y   | 26 ± 7**           | H363Y   | 52 ± 11*           |
| R44H    | 109 ± 15           | L231P   | 3 ± 2***           | E294K   | 45 ± 11            | F367L   | 100 ± 39           |
| S84T    | 52 ± 14            | C236Y   | 6 ± 3***           | R310Q   | 45 ± 4*            | R376Q   | 117 ± 28           |
| P96L    | 93 ± 16            | A239T   | 46 ± 13*           | R310W   | 5 ± 2***           | R376W   | 101 ± 24           |
| P137L   | 82 ± 17            | L244F   | 57 ± 13            | A316T   | 13 ± 5***          | R380C   | 44 ± 4**           |
| H171Q   | 141 ± 24           | V249M   | 99 ± 37            | I317T   | 25 ± 9***          | I400R   | ND                 |
| H173P   | 11 ± 7***          | S258L   | 27 ± 11**          | N320Y   | ND                 | L401I   | 58 ± 18            |
| H173R   | 143 ± 48           | S261A   | 91 ± 14            | R326W   | 50 ± 7             | E408G   | 18 ± 11**          |
| T175I   | 97 ± 31            | W264R   | 134 ± 19           | V331M   | 78 ± 12            | W417G   | 10 ± 6***          |
| R176W   | 3 ± 1***           | L268F   | 12 ± 5***          | N338K   | 76 ± 20            | W417L   | 89 ± 31            |
| H180Y   | 10 ± 5***          | V270M   | 91 ± 8             | C341S   | 127 ± 32           | R419H   | 77 ± 9             |
| R190Q   | 21 ± 2***          | V287D   | 11 ± 5***          | D344E   | 78 ± 10            | R421Q   | 125 ± 12           |
| V194I   | 113 ± 45           | L290F   | 80 ± 9             | T355I   | 104 ± 22           | R421W   | 76 ± 19            |
| A208T   | 88 ± 17            | Y291C   | 10 ± 5***          | I357F   | 33 ± 13*           | P435L   | 55 ± 12            |
| R227C   | 39 ± 11            | E292V   | 6 ± 1***           | G361R   | 2 ± 1***           | S445T   | 183 ± 13**         |

127

128

129

130

All values are expressed as means ± SEM of at least three independent experiments. Statistical significance of differences was determined by one-way analysis of variance and Dunnett's post-test \*P < 0.05, \*\*P < 0.01, \*\*\*P < 0.0001. exp, expression.

131 **Supplementary Table 3a. Summary of the functional profiling of cAMP accumulation by WT and**  
132 **mutant GLP1R.** (see Excel file).  
133

134 **Supplementary Table 4. Null *GLP1R* variants detected in the UK Biobank**

| <b>GLP1R variants (NM_002062.5)</b> | <b>MAF UKB</b> |
|-------------------------------------|----------------|
| c.32dup/p.Leu12AlafsTer41           | 0.0000025      |
| c.76del/p.Gln26ArgfsTer25           | 0.0000053      |
| c.76dup/p.Gln26ProfsTer27           | 0.0000053      |
| c.79-2A>C                           | 0.0000027      |
| c.118C>T/p.Arg40Ter                 | 0.000013       |
| c.126C>G/p.Tyr42Ter                 | 0.0000025      |
| c.127C>T/p.Arg43Ter                 | 0.0000050      |
| c.152_155del/p.Thr51ArgfsTer30      | 0.0000076      |
| c.245dup/p.Asn82LysfsTer26          | 0.0000075      |
| c.284-2A>G                          | 0.0000025      |
| c.391C>T/p.Arg131Ter                | 0.0000025      |
| c.402+1G>A                          | 0.0000078      |
| c.568C>T/p.Arg190Ter                | 0.0000050      |
| c.670_671del/p.Leu224GlufsTer38     | 0.0000025      |
| c.722dup/p.Tyr241Ter                | 0.0000025      |
| c.823+1del                          | 0.0000025      |
| c.824-1G>C                          | 0.0000025      |
| c.1117G>T/p.Glu373Ter               | 0.0000025      |
| c.1337del/p.Gly446GlufsTer76        | 0.0000025      |

135 MAF, minor allele frequency; UKB, UK biobank

136

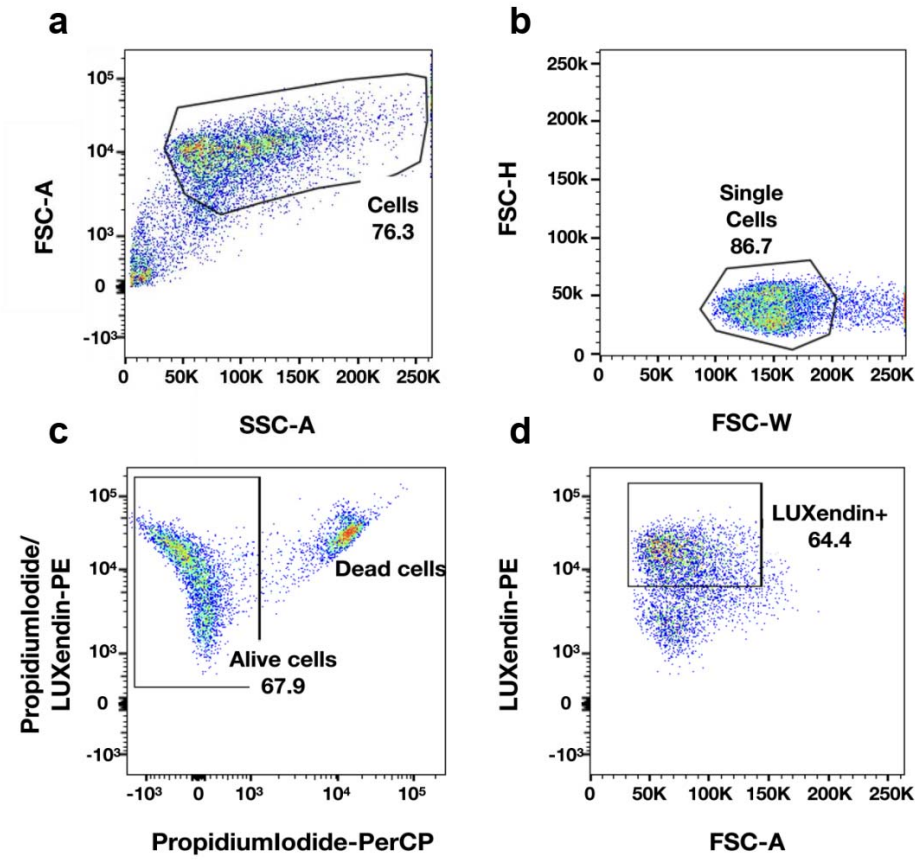

137  
138  
139  
140

**Supplementary Fig. 1 Sequence of Gating Steps in Flow Cytometry Experiments.** **a**, Selection of cells; **b**, Selection of single cell; **c**, Selection of live cells; **d**, selection of LUXendin+cells. Numbers represent the % of selected cells.

## 141 **Supplementary data analysis of signaling profiles of GLP1R mutants:**

142

### 143 **cAMP pathway**

144 The  $E_{\max}$  of Ex-4 to promote cAMP production was significantly diminished for eight mutants of which the five  
145 most severely affected ones (p. R176W, p. H180Y, p.N320Y, p.G361R and p.I400R) could be explained by  
146 severely impaired cell surface expression ([Supplementary Table 2a](#) and [Supplementary Table 3a](#) and [Fig. 2a](#)  
147 [and Extended Data Fig. 6a](#)). Twelve mutants showed a GoF phenotype with a significant, up to 200%, increase  
148 in  $E_{\max}$  (ten from the ‘cAMP GoF’ category ([Fig. 2f](#) and [Extended Data Fig. 6f](#), [Supplementary Table 3a](#)) and  
149 p.V287D ([Extended Data Fig. 6a](#)) and p.A316T ([Fig. 2g](#))). The cell surface expression levels of these mutants  
150 ranged from 31 to 95% of WT GLP1R ([Supplementary Table 2a](#)). Twenty mutants showed significantly lower  
151 potencies with seven of them being severely affected ( $EC_{50}$  right-shifted by 2 logs). Among these, five mutants  
152 belong to the category of mutants of ‘Severely surface exp defective’ (p. R176W, p.L231P, p.V287D, p.E292V,  
153 p.R310W) and two (p.R190Q, p.R380C) to the category of ‘All pathways defective’.

154 The correlation curve between cell surface expression and cAMP signaling ([Extended Data Fig. 4b](#)) allowed us  
155 to define mutants with less than  $10 \pm 3$  % cell surface expression compared to WT GLP1R as an independent  
156 category of ‘Severely surface exp defective’ ([Fig. 2a](#) and [Extended Data Fig. 6a](#)). This category comprises  
157 variants encoding p.H173P, p.R176W, p.H180Y, p.L231P, p.V287D, p.E292V, p.R310W, p.N320Y, p.G361R  
158 and p.I400R. The severely impaired cell surface expression of these mutants is consistent with absence of any  
159 measurable Ex-4 binding in the TR-FRET-based ligand competitive binding assay for six members of this  
160 category (p.H173P, p.H180Y, p.L231P, p.N320Y, p.G361R and p.I400R) ([Extended Data Fig. 7](#)). The variant  
161 encoding p.R380C shows normal surface expression but severely impaired Ex-4 binding consistent with  
162 previous results obtained with an alanine substituted receptor at this position (Wootten et al, 2016). GoF mutants  
163 show increased  $E_{\max}$  values despite normal surface expression.

164

### 165 **Ca<sup>2+</sup> mobilization**

166 Similar to cAMP accumulation, the Ca<sup>2+</sup> mobilization responsiveness was also differentially affected, with 21  
167 LoF or GoF mutants each ([Supplementary Table 3b](#)). All mutants of the ‘Severely surface exp defective’  
168 category were also defective in Ca<sup>2+</sup> mobilization, similar to the cAMP pathway ([Fig. 2a](#) and [Extended Data](#)

169 Fig. 6a). In contrast to the cAMP pathway, only  $E_{\max}$  values were affected without any change in  $EC_{50}$   
170 (Supplementary Table 3b). To compensate for the impact of differences in cell surface expression of mutants,  
171 correlation curves with  $EC_{50}$  and  $E_{\max}$  were generated (Extended Data Fig. 5a). Whereas  $E_{\max}$  values increased  
172 linearly (Extended Data Fig. 5b),  $EC_{50}$  values were unaffected by the cell surface expression level (Extended  
173 Data Fig. 5c). After normalization to cell surface expression, ten mutants belonged to the 'Ca<sup>2+</sup> GoF' category  
174 (Fig. 2g and Extended Data Fig. 6g). For all of them only  $E_{\max}$  values were affected (up to 235% increase over  
175 WT GLP1R). Interestingly, three GoF variants encoding p.S258L, p.E408G and p.W417G exhibited clearly  
176 increased Ca<sup>2+</sup> mobilization in the context of normal cAMP production and significantly decreased cell surface  
177 expression (Extended Data Fig. 6g and Supplementary Table 2a). Five mutants were GoF for both cAMP and  
178 Ca<sup>2+</sup> pathways (p.Y291C, p.E294K, p.A316T, p.N338K and p.C341C) (Fig. 2g and Extended Data Fig. 6f). In  
179 conclusion, Ca<sup>2+</sup> mobilization is affected in 2/3 of the studied GLP1R mutants with both LoF and GoF in  $E_{\max}$ .  
180

### 181 ERK1/2 activation by GLP1R mutants

182 Ex-4 induced a rapid increase in ERK1/2 activation for the WT GLP1R reaching a plateau at 5 minutes that  
183 was maintained for up to 1 hour (Extended Data Fig. 3e). At 5 minutes, the ERK1/2 activation was fully blocked  
184 by the PKA inhibitor H89 but not by  $\beta$ -arr1/2 silencing (Extended Data Fig. 3k-n) indicating that the  
185 Gs/cAMP/PKA pathway is the predominant input pathway at 5 minutes of stimulation in HEK293T cells. Ex-  
186 4-induced ERK1/2 activation of GLP1R mutants was tested at 5 minutes. Twenty-seven mutants showed  
187 significantly impaired ERK1/2 activation and one mutant (p.S258L) increased ERK1/2 activation  
188 (Supplementary Table 3c). Similar to Ca<sup>2+</sup> mobilization, only  $E_{\max}$  values, but not  $EC_{50}$  values, were affected.  
189 A linear correlation was observed for  $E_{\max}$  values and cell surface expression and no influence of the latter on  
190  $EC_{50}$  values (Extended Data Fig. 5d-f). Three mutants (p.L231P, p.E292V, and p.R310W) highlighted the  
191 robustness of the ERK1/2 pathway compared to the other pathways as the ERK1/2 pathway was the only one  
192 maintaining a notable level of activation upon Ex-4 stimulation at low receptor cell surface expression  
193 (Extended Data Fig. 6a). In contrast, three other variants encoding p.H173R, p.A239T, and p.D344E showed  
194 an ERK-specific defect (Fig. 2e, Extended Data Fig. 6e and Supplementary Table 3c).

195

### 196 $\beta$ -arr2 recruitment by GLP1R mutants

197 With 41 defective mutants, the  $\beta$ -arr2 recruitment was the most affected pathway in our study. For 17 mutants  
198  $\beta$ -arr2 recruitment was completely undetectable including all 10 mutants of the ‘Severely surface exp defective’  
199 category and all four mutants of the ‘All pathways defective’ category (Fig. 2, Extended Data Fig. 6 and  
200 Supplementary Table 3d). Correlation curves of  $EC_{50}$  and  $E_{max}$  for surface expression were generated (Extended  
201 Data Fig. 5g) and showed a similar behavior as the correlation curves for the  $Ca^{2+}$  and ERK pathways; whereas  
202  $E_{max}$  values increased linearly with increased cell surface expression (Extended Data Fig. 5h),  $EC_{50}$  values were  
203 unaffected (Extended Data Fig. 5i). After normalization to cell surface expression, 16 additional mutants  
204 showed decreased  $E_{max}$  values and eight variants a modest decrease in  $EC_{50}$  values. With nine mutants (p.P96L,  
205 p.H171Q, p.A208T, p.L268F, p.I317T, p.I357F, p.H363Y, p.R376Q, and p.S445T), the ‘ $\beta$ -arr2 specific  
206 defective’ category represented the largest pathway specific category of this study (Fig. 2d, Extended Data Fig.  
207 6d and Supplementary Table 3d). A distinctive feature of this category is the predominant defect in  $EC_{50}$  values  
208 for all members with an additional defect in  $E_{max}$  for p.I317T, p.I357F, p.H363Y, most likely because of  
209 diminished cell surface expression (Fig. 2d, Extended Data Fig. 6d and Supplementary Table 3d). Of note,  
210 p.I317T and p.I357F are the most pathway-selective mutants with a complete (p.I357F) or almost complete  
211 (p.I317T) absence of  $\beta$ -arr2 recruitment and normal signaling on the other pathways. In conclusion, the  $\beta$ -arr2  
212 pathway represents the pathway for which most of the mutants are affected with diminished  $EC_{50}$  and/or  $E_{max}$ .  
213 GoF was not observed for this pathway.
